# Supplementary material
Source: Springer Nature journal article supplement (https://www.springermedizin.de/resource/supplementary/12888_2008_514_MOESM6_ESM.pdf/9483474)

Depression (lifetime prevalence) in men and women

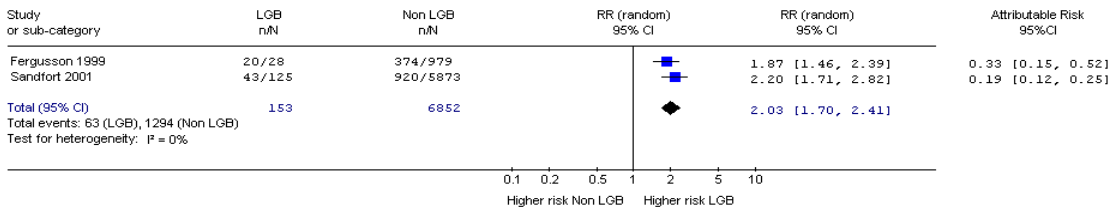

Depression (lifetime prevalence) in men only

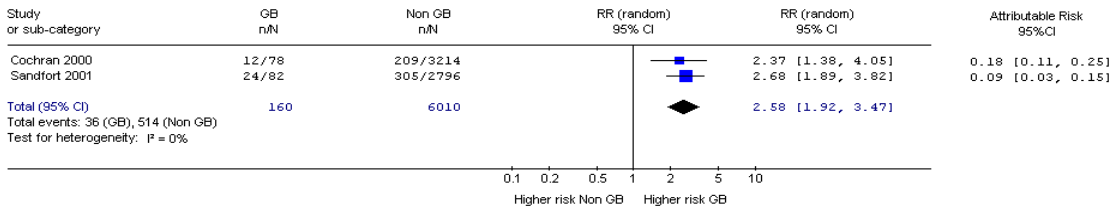

Depression (12 months prevalence) in men and women

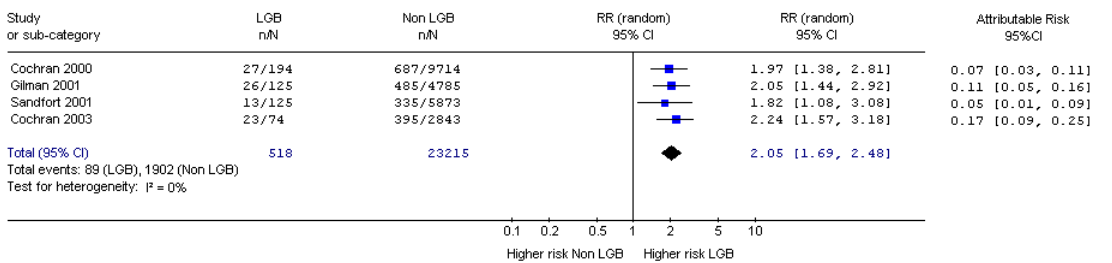

Depression (12 months prevalence) in men only

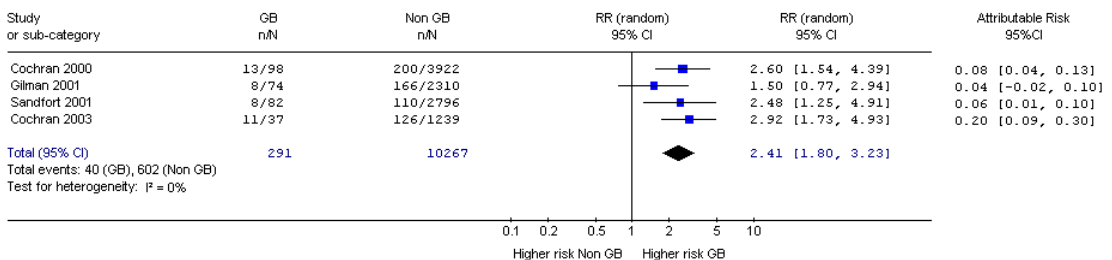

Depression (12 months prevalence) in women only

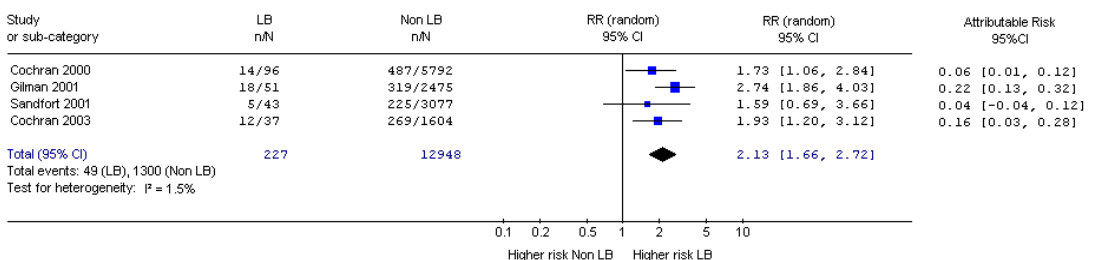

Supplement: MOESM6 [file 9483474]
